# Supplementary material for: Bioinspired photothermal conversion coatings with self-healing superhydrophobicity for efficient solar steam generation
Source: Royal Society of Chemistry journal article supplement (doi:10.1039/c8ta08706g), 2018-01-01
Supplement: c8ta08706g5.pdf [file c8ta08706g5.pdf]

—Supporting Information—

**Bioinspired Photothermal Conversion Coatings with Self-  
Healing Superhydrophobicity for Efficient Solar Steam  
Generation**

*Dehui Weng, Fuchang Xu, Xiang Li, Yang Li\* and Junqi Sun*

State Key Laboratory of Supramolecular Structure and Materials, College of  
Chemistry, Jilin University, Changchun 130012, PR China.

\*E-mail: yanglichem@jlu.edu.cn

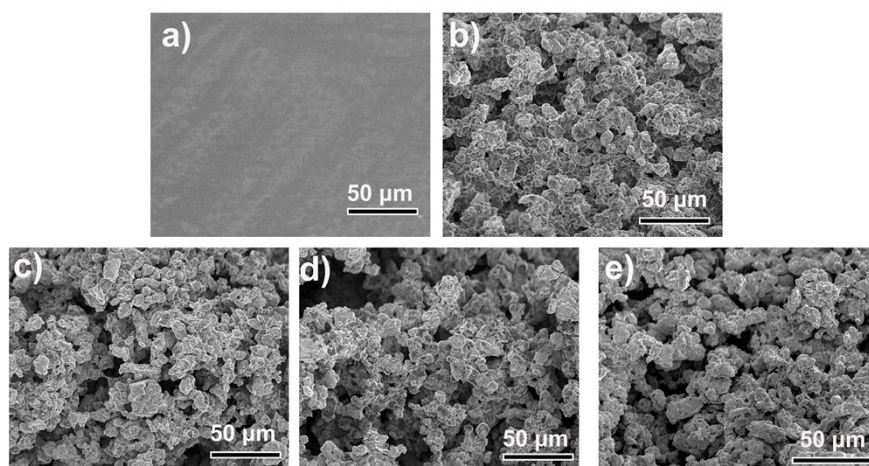

**Fig. S1** SEM images of (a) the bare glass and the BCP<sub>n</sub> coatings with *n* being (b) 1, (c) 3, (d) 5, and (e) 7.

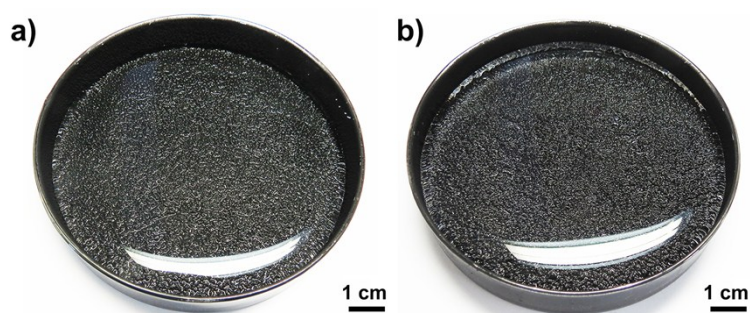

**Fig. S2** (a) Photo image of the BCP<sub>7</sub>-coated petri dish with 50 mL of water. (b) Photo image of the petri dish in (a) after being placed in ambient conditions for 2 months.

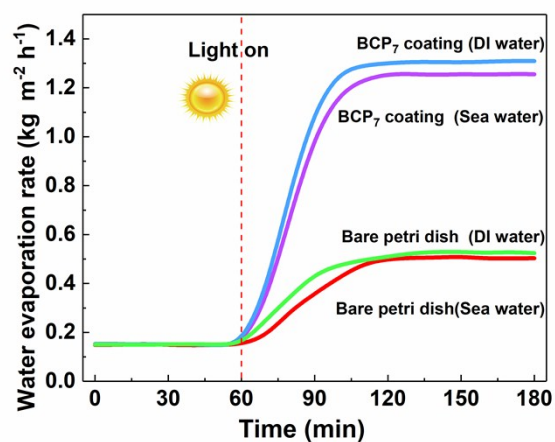

**Fig. S3** Evaporation rates of the DI water and sea water in the BCP<sub>7</sub>-coated and bare petri dishes under simulated solar light irradiation.

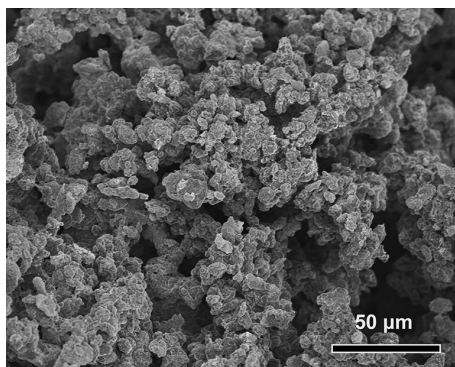

**Fig. S4** SEM image of the BCP<sub>7</sub> coating that experienced a 56-h solar steam generation experiment.

After 56 h of solar steam generation (8 h a day for 7 d), no decomposition of the BCP<sub>7</sub> coating was observed. The CA and SA on the BCP<sub>7</sub> coating remained at 159.1° and 1.0°, respectively. The SEM image of the coating indicates that the surface structures of the coating was well preserved (Fig. S4).

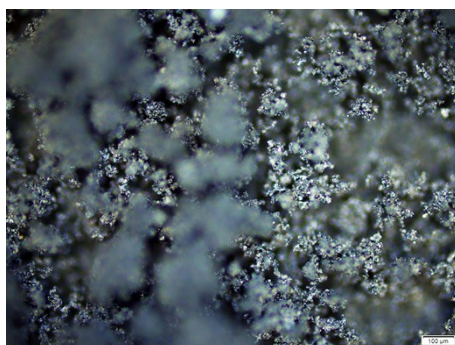

**Fig. S5** Microscope image of the surface of the BCP<sub>7</sub> coating after evaporating sea water for 56 h.

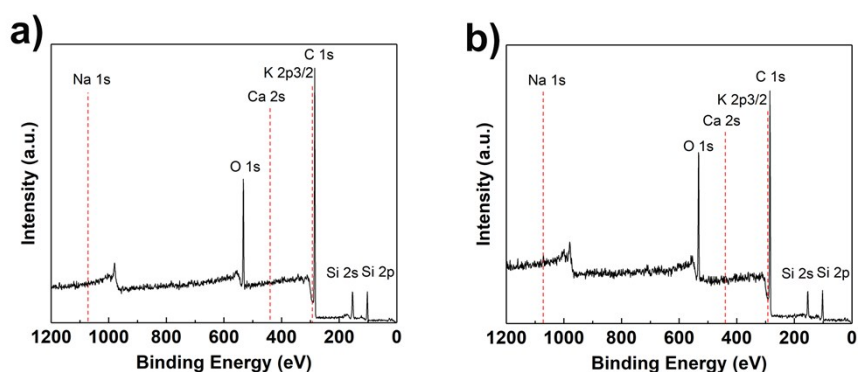

**Fig. S6** XPS spectra of the BCP<sub>7</sub> coating (a) before and (b) after evaporating sea water for 56 h.

As shown in Fig. S6b, the signals for Na, Ca and K were not found, suggesting that the salt accumulation on the BCP<sub>7</sub> coating was negligible.

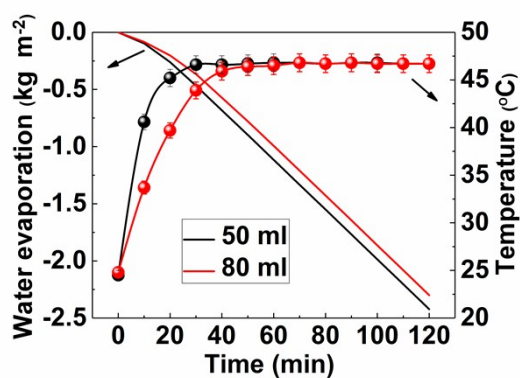

**Fig. S7** Changes of the temperature and mass of 50-mL and 80-mL water under light irradiation.

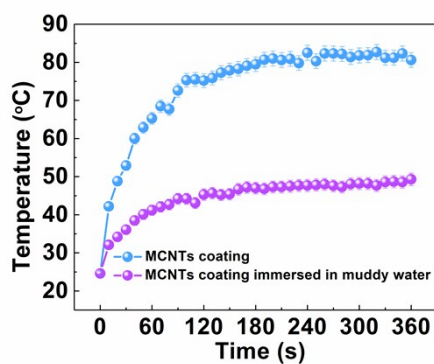

**Fig. S8** Photothermal conversion ability of the MCNTs coating before and after immersion in muddy water for 12 h.

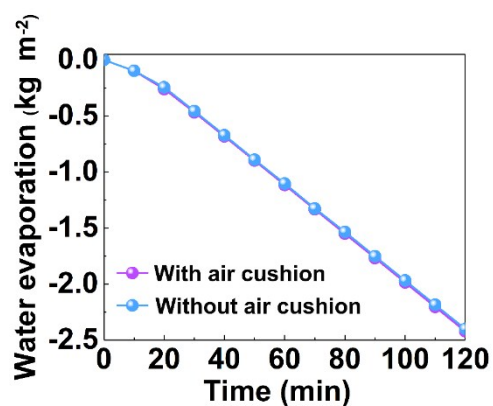

**Fig. S9** Changes of the water mass in the BCP<sub>7</sub>-coated petri dish with and without air cushion.

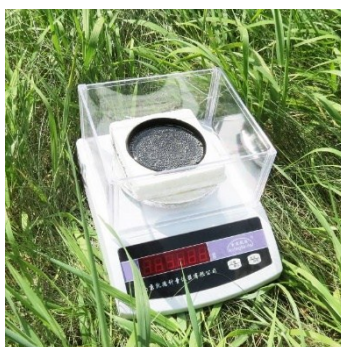

**Fig. S10** Optical image of the portable balance that was used to measure the mass loss of water in the BCP<sub>7</sub>-coated petri dish under natural sunlight irradiation.

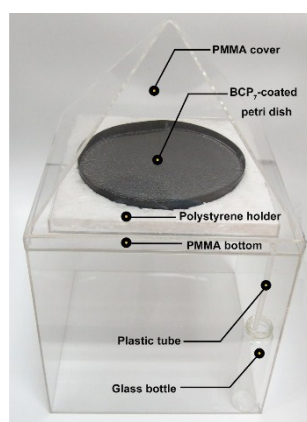

**Fig. S11** Optical image of the portable solar desalination.

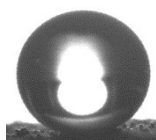

**Fig. S12** CA on the BCP<sub>7</sub> coating after applying a voltage of 30 V for 30 min.

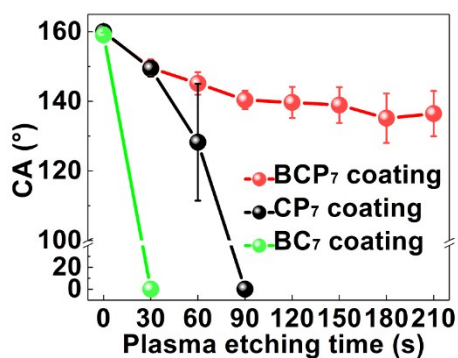

**Fig. S13** CAs on the BCP<sub>7</sub>, CP<sub>7</sub> and BC<sub>7</sub> coatings after plasma treatment for different time.

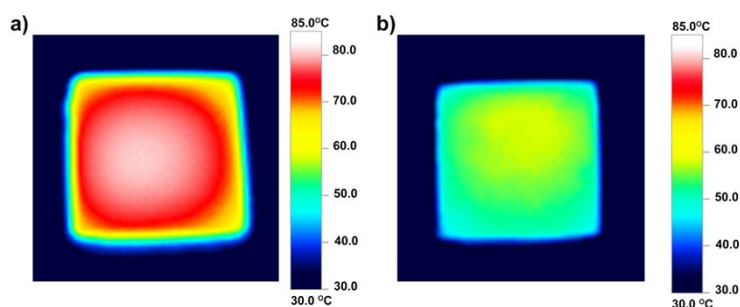

**Fig. S14** Infrared images of photothermal abilities of (a) the BCP<sub>7</sub> coating experienced 20 etching/healing cycles and immersion in muddy water, and (b) the CP<sub>7</sub> coating experienced 5 etching/healing cycles and immersion in muddy water.

**Table S1.** Comparison of the self-healing ability, mechanical durability and conductivity of the BCP<sub>7</sub> coatings with different mass ratio of beeswax (b), MCNTs (c) and PDMS (p).

| Mass Ratio<br>(b:c:p) | Healing Cycles <sup>a</sup> | Sand Impact Test <sup>b</sup> | Conductivity ( $\Omega \text{ sq}^{-1}$ ) |
|-----------------------|-----------------------------|-------------------------------|-------------------------------------------|
| 0.5:2:1.5             | 4                           | Pass <sup>c</sup>             | $171.7 \pm 7.9$                           |
| 1:2:1.5               | 20                          | Pass                          | $232.3 \pm 6.1$                           |
| 1.5:2:1.5             | 24                          | Fail <sup>d</sup>             | $1233.0 \pm 82.8$                         |
| 1:2:1                 | 21                          | Fail                          | $215.9 \pm 4.2$                           |
| 1:2:2                 | 9                           | Pass                          | $972.1 \pm 42.6$                          |

*a* defined as the maximum number of plasma/healing cycles that the coating can repair its superhydrophobicity.

*b* sand grains with diameters ranging from 90 to 260  $\mu\text{m}$  fell onto the sample, held at 45° to the horizontal surface, from a funnel with a drop rate of 12.85  $\text{g min}^{-1}$ . The distance between the funnel and the sample was 2 m. Microscopoe images of the samples are shown in Fig. S15.

*c* means that the surface structures of the coating was unchanged after being impinged by sands.

*d* means that the surface structures of the coating was damaged after being impinged by sands.

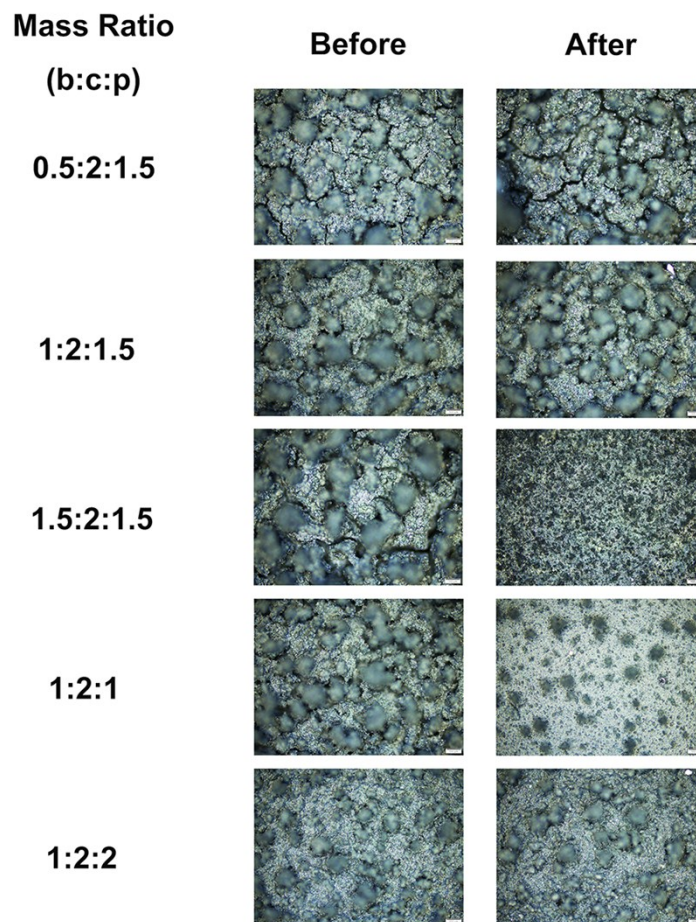

**Fig. S15** Microscope images of surfaces the BCP<sub>7</sub> coatings with different mass ratio of beeswax, MCNTs and PDMS before (left column) and after (right column) sand impact experiments. The scale bars are 100 μm.
